# Supplementary material for: Freely Available, Fully Automated AI-Based Analysis of Primary Tumour and Metastases of Prostate Cancer in Whole-Body [18F]-PSMA-1007 PET-CT
Source: MDPI journal article supplement (doi:10.3390/diagnostics12092101), 2022-08-30
Supplement: s1 [file s1]

## Supplementary files

**Table S1.** Pixelwise encoding for the organ mask. Each pixel encodes 6 different channels (Ch. x) according to the labels given by the automatic segmentation. If the segmentation yields any other label, all channels are encoded as 0.

| Organ labels                             | Ch. 0 | Ch. 1 | Ch.2 | Ch. 3 | Ch.4 | Ch. 5 |
|------------------------------------------|-------|-------|------|-------|------|-------|
| Brain                                    | 0     | 0     | 1    | 0     | 0    | 0     |
| Pancreas,<br>ventricle, liver,<br>spleen | 0     | 0     | 0    | 1     | 0    | 0     |
| Kidney                                   | 0     | 0     | 0    | 0     | 1    | 0     |
| Urinary bladder                          | 1     | 0     | 0    | 0     | 0    | 1     |
| Bone                                     | 1     | 1     | 0    | 0     | 0    | 0     |
| Hip Bone                                 | 1     | 1     | 0    | 0     | 0    | 1     |
| Gastrointestinal<br>tract                | 1     | 0     | 1    | 0     | 0    | 0     |
| Aorta                                    | 1     | 0     | 0    | 1     | 0    | 0     |
| Lung, Trachea,<br>Bronchi                | 1     | 0     | 0    | 0     | 1    | 0     |
